# Supplementary material for: Comprehensive Pan-Cancer Analysis of KIF18A as a Marker for Prognosis and Immunity
Source: MDPI journal article supplement (doi:10.3390/biom13020326), 2023-02-08
Supplement: s1 [file s1]

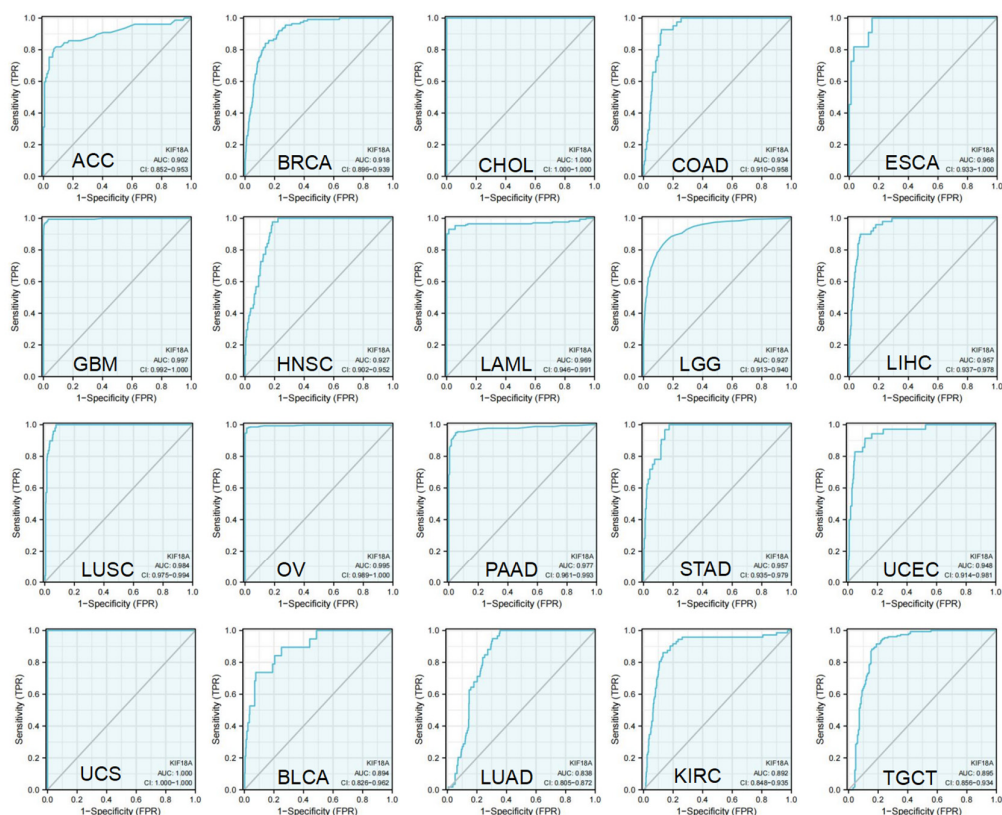

**Figure S1.** The ROC curve for KIF18A in ACC, BRCA, CHOL, COAD, ESCA, GBM, HNSC, LAML, LGG, LIHC, LUSC, OV, PAAD, STAD, UCEC, UCS, BLCA, LUAD, KIRC and TGCT.

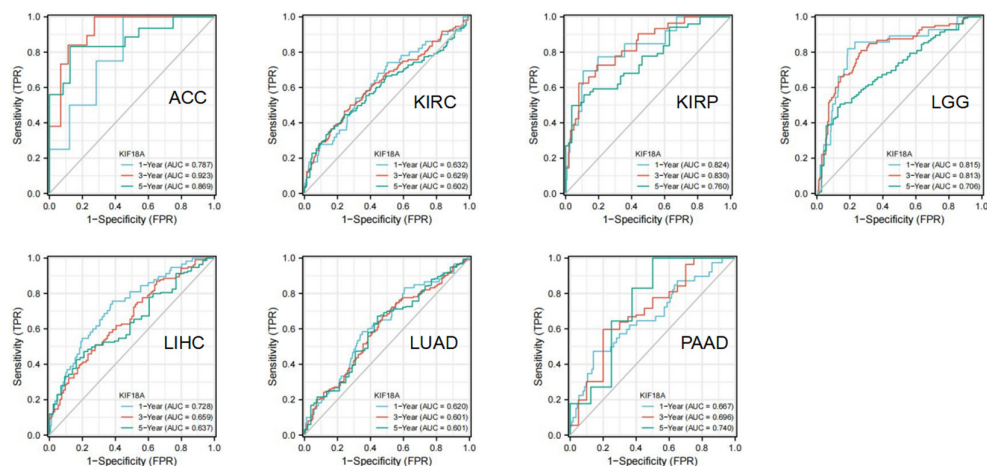

**Figure S2.** The time-dependent ROC curve of 1-3-5-year in ACC, KIRC, KIRP, LGG, LIHC, LUAD and PAAD.

**Table S1.** Relationship between KIF18A methylated CpG and survival.

|             | <b>CpG</b> | <b>HR</b> | <b>P value</b> |
|-------------|------------|-----------|----------------|
| <b>ACC</b>  | cg08967200 | 0.426     | 0.033          |
|             | cg10470873 | 0.432     | 0.03           |
|             | cg19562854 | 0.454     | 0.048          |
| <b>BLCA</b> | cg08967200 | 1.427     | 0.029          |
|             | cg19562854 | 1.388     | 0.043          |
| <b>CESC</b> | cg16497921 | 1.644     | 0.039          |
| <b>COAD</b> | cg16786315 | 1.659     | 0.039          |
|             | cg19562854 | 1.641     | 0.046          |
| <b>ESCA</b> | cg16786315 | 1.699     | 0.021          |
| <b>HNSC</b> | cg08967200 | 1.315     | 0.044          |
| <b>KIRC</b> | cg08967200 | 1.917     | 0.0012         |
|             | cg10470873 | 0.453     | 0.003          |
|             | cg16497921 | 0.596     | 0.038          |
|             | cg16786315 | 0.426     | 0.0018         |
| <b>KIRP</b> | cg10470873 | 2.07      | 0.028          |
|             | cg16497921 | 4.434     | 0.013          |
|             | cg19562854 | 2.636     | 0.043          |
| <b>LAML</b> | cg16497921 | 1.576     | 0.031          |
| <b>LGG</b>  | cg10470873 | 0.629     | 0.017          |
|             | cg19562854 | 0.632     | 0.018          |
| <b>LIHC</b> | cg08967200 | 1.866     | 0.01           |
|             | cg16497921 | 1.557     | 0.012          |
|             | cg16786315 | 1.498     | 0.02           |
|             | cg19562854 | 1.734     | 0.0017         |
| <b>MESO</b> | cg19562854 | 0.555     | 0.014          |
| <b>PAAD</b> | cg16786315 | 1.514     | 0.044          |
|             | cg19562854 | 0.572     | 0.011          |
| <b>SARC</b> | cg16497921 | 0.666     | 0.049          |
|             | cg16786315 | 0.572     | 0.0073         |
| <b>SKCM</b> | cg10470873 | 1.314     | 0.045          |
|             | cg16786315 | 0.717     | 0.039          |
| <b>STAD</b> | cg10470873 | 1.65      | 0.018          |
| <b>UCEC</b> | cg10470873 | 2.065     | 0.022          |
|             | cg16497921 | 2.349     | 0.012          |
|             | cg16786315 | 2.197     | 0.013          |
